# Supplementary material for: Interaction of myxobacteria-derived outer membrane vesicles with biofilms: antiadhesive and antibacterial effects
Source: Royal Society of Chemistry journal article supplement (doi:10.1039/d1nr02583j), 2021-01-01
Supplement: d1nr02583j1.pdf [file d1nr02583j1.pdf]

## Supplementary Information

### Interaction of myxobacteria-derived outer membrane vesicles with biofilms: antiadhesive and antibacterial effects

Adriely Goes, Lucia Vidakovic, Knut Drescher, and Gregor Fuhrmann

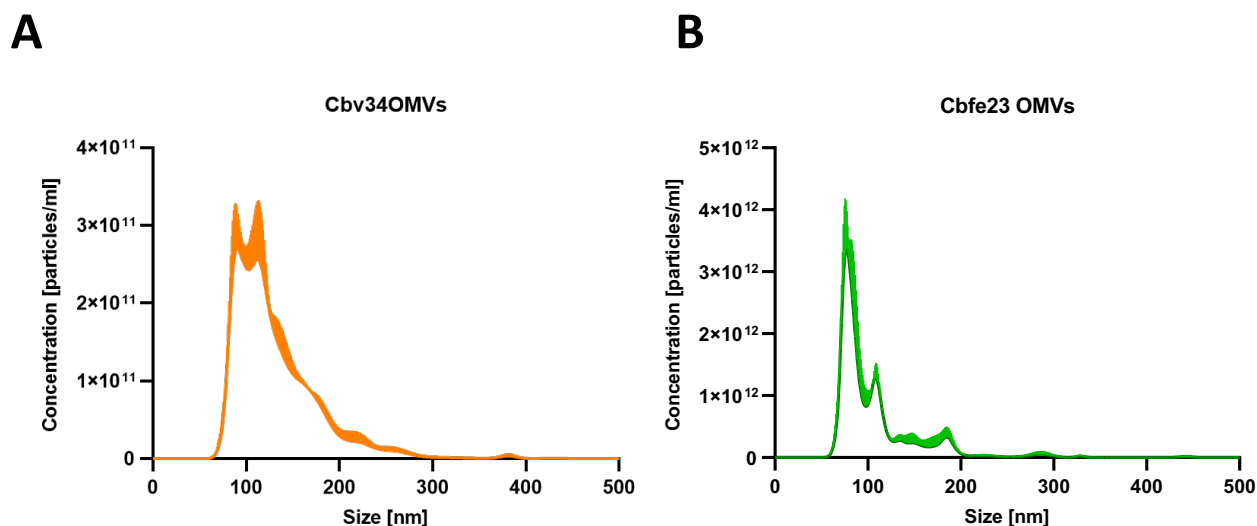

**Figure S1:** Representative graph of size distribution of (A) Cbv34 OMV pellet and (B) Cbfe23 OMV pellet measured by nanoparticle tracking analysis (NTA). Values are the mean + SEM.

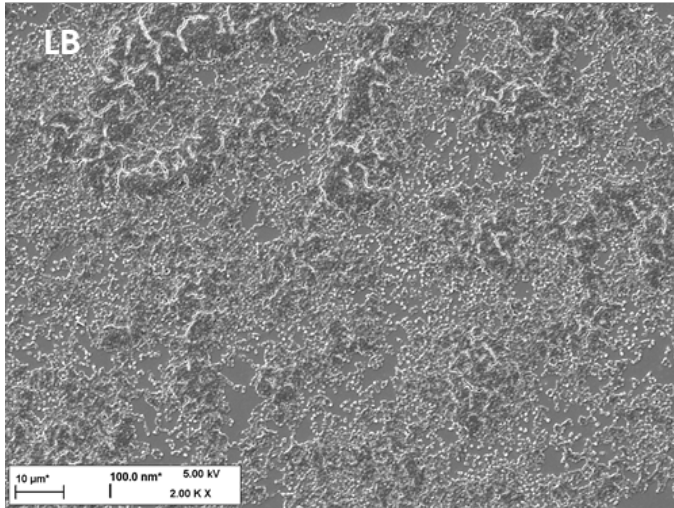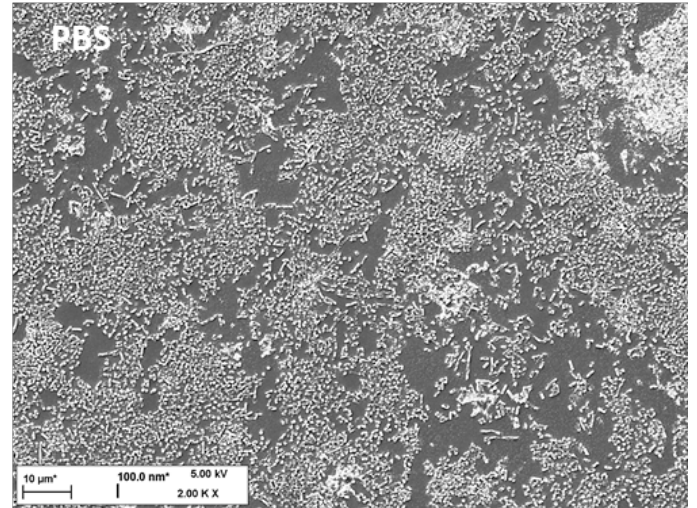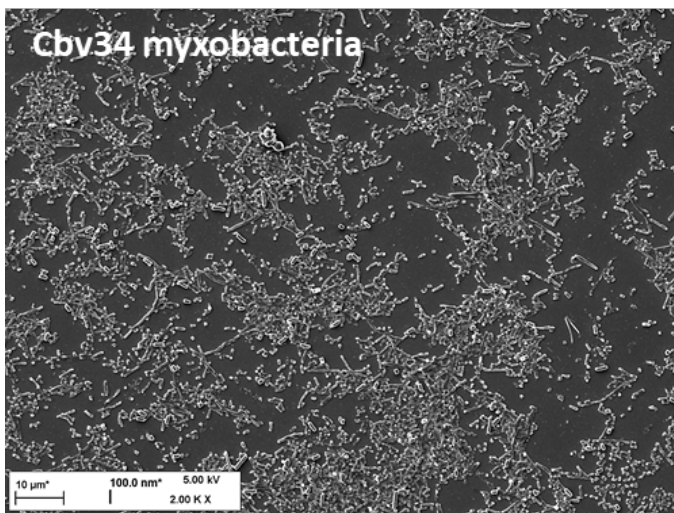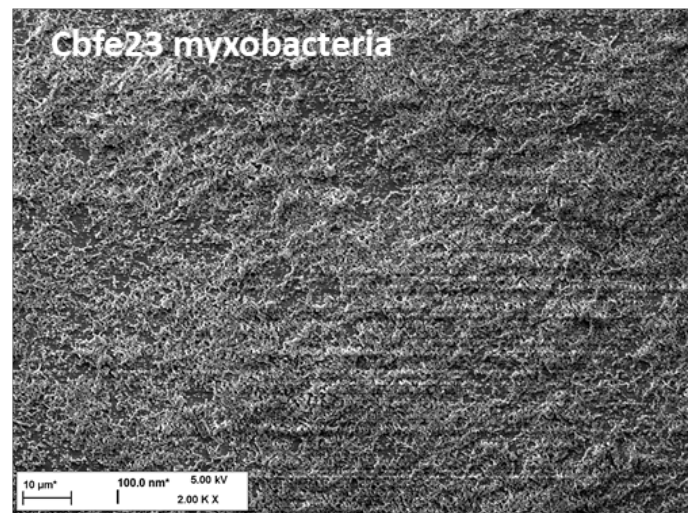

**Figure S2:** Representative scanning electron microscopy (SEM) of the preformed biofilm assay. The biofilm was treated with myxobacterial suspensions of Cbv34 and Cbfe23 diluted to  $OD_{600}$  0.5 and incubated for 24 h at 37 °C.
